# Supplementary material
Source: publisher site journal article supplement (https://www.dovepress.com/article/370492)
Supplement: Supplementary file 1 [file get_supplementary_file.php]

**Supplementary Materials**

***Preparation of LGZGD***

Details of *Poria cocos (Schw.) Wolf*, *Cinnamomum cassia Presl*, *Atractylodes macrocephala* and *Glycyrrhiza Radix* are provided as described in **Table S1**. The formula particles were prepared and quality controlled in accordance with the Chinese Pharmacopoeia (RC, 2015).

***High performance liquid chromatography(HPLC)***

HPLC was performed on a chromatograph Waters 2695 instrument with chromatographic separation in a Waters C18 column (250*4.6mm 3um) with flow and column temperature set at 1 ml/min and 25°C with a sample intake of 10 microliters.The flow phase ratio A/B is 95/5, in which the aqueous phase is 0.1% phosphate and the organic phase is acetonitrile.The detection wavelength was 240nm.

| **Table S1** | **The components of LGZGD.** |
| --- | --- |

|  |  |  |  |  |  |  |
| --- | --- | --- | --- | --- | --- | --- |
| Herbal name | Botanical Latin name | Place of origin | Part used | Amount used(g) | lot number |  |
| Fu-Ling | *Poria cocos (Schw.) Wolf* | Anhui | Dried sclerotia | 12 | 20043524 |  |
| Gui-Zhi | *Cinnamomum cassia Presl* | Guangxi | Dried Tender branches | 9 | 20018273 |  |
| Bai-Zhu | *Atractylodes macrocephala* | Anhui | Dried rhizome | 9 | 20020171 |  |
| Gan-Cao | *Glycyrrhiza Radix* | Gansu | Dried root and rhizome | 6 | 20023191 |  |

**Supplementary Results**

The characteristic HPLC of one LGZGD, as shown by **Figure S1**, and LGZGD mainly contains four compounds, glycyrrhizate, glycyrrhizin, cinnamate and chlorogenic acid, are essentially consistent with those prescribed by the Chinese Pharmacopoeia.


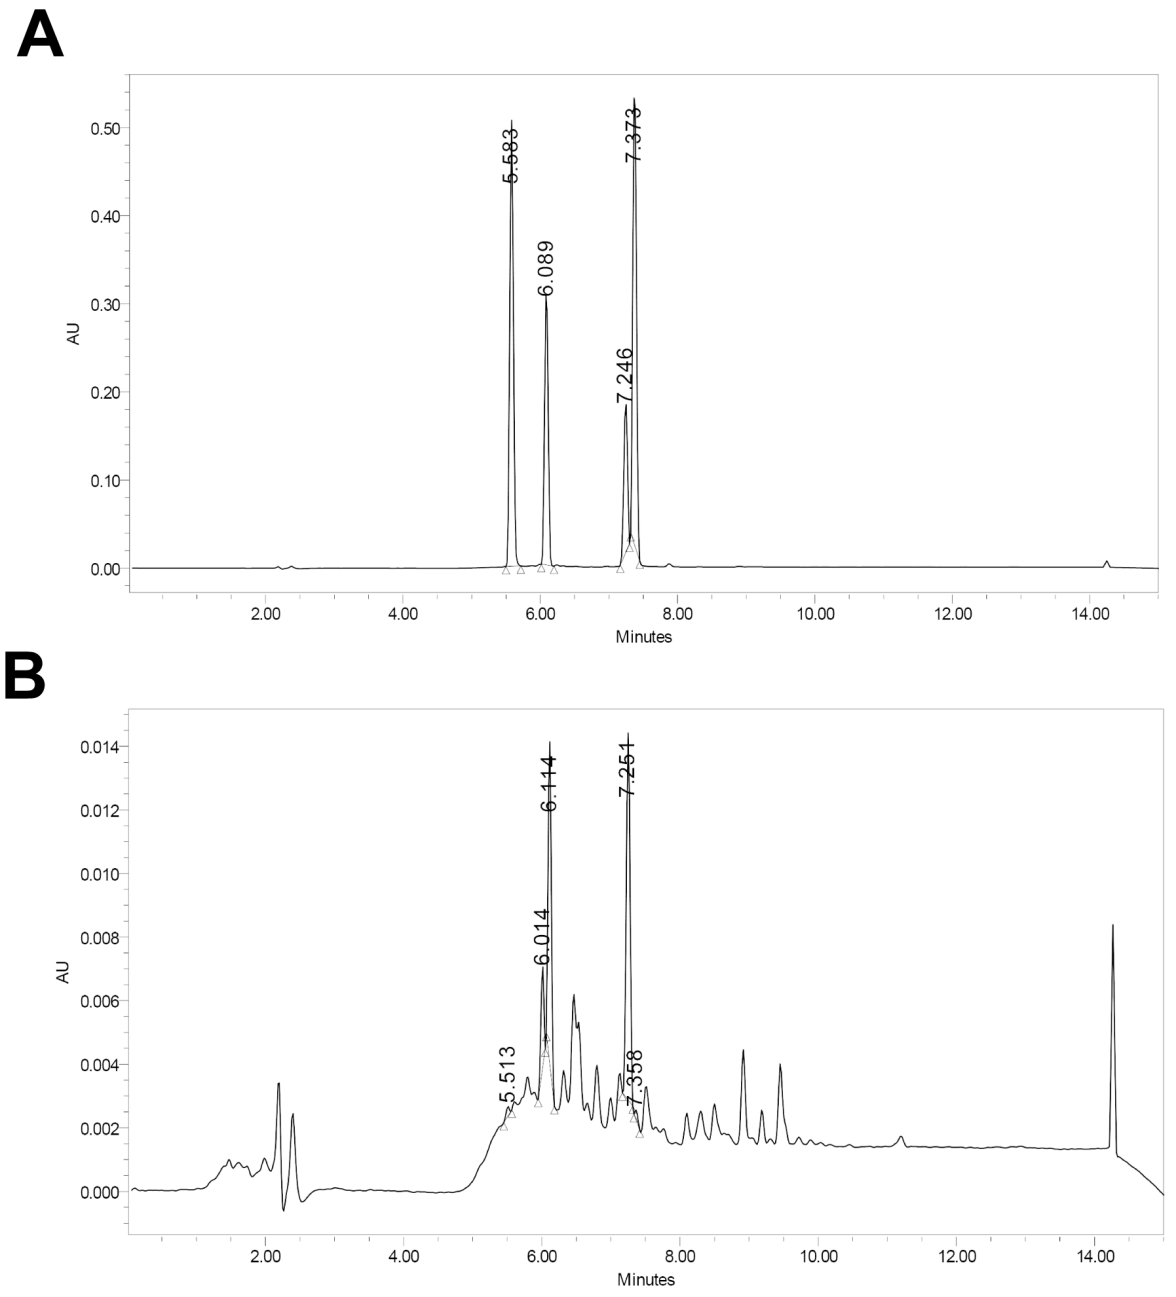


B

A

**Figure S1. HPLC characterization of LGZGD. (A)** mixed standards and **(B)** LGZGD sample by HPLC.

**Table S2**

| Cyp8b1-R | TGCCCACTGGCCATCTTTAG |
| --- | --- |
| TGR5-F | TCAGTCTTGGCCTATGAGCG |
| TGR5-R | TCGAAGCACTTGTAGCCACC |
| BSEP-F | TGGCTCCGTCAAGTTCACAT |
| BSEP-R | TCAGCTTTTGGCTCAGAGGAG |
| MRP2-F | CTTTGTTCTGTCCAACGCCC |
| MRP2-R | CAGGGCGCCTCATTCTCTAC |
| MRP3-F | CACATGGACCGCTTGTGC |
| MRP3-R | GGAGTTCTGGAAACAGGGTGT |
| ASBT-F | CCATCGCAGGTGCAATTCTC |
| ASBT-R | CCTGTACCAGGGTTGACCAG |
| CYP7A1-F | GATTTGGGGAATTGCCGTGT |
| CYP7A1-R | AGCCCAGGTACGGAATCAAC |
| GAPDH-F | GAAGGTCGGTGTGAACGGAT |
| GAPDH-R | CCCATTTGATGTTAGCGGGAT |
|  |  |
|  |  |
